# Supplementary material
Source: ML conference proceedings conference paper supplement (https://proceedings.mlr.press/v80/wu18e.html)
Supplement: Supplementary file [file wu18e-supp.pdf]

## A. Proof of Proposition 1

*Proof.* Let  $\alpha = 1 - p$ . If  $\mathcal{B}$  happens, then  $F_\theta(\mathbf{x}')_y \leq \alpha$  for some  $\mathbf{x}' \in \mathbf{x} + \mathcal{S}$ , and  $\kappa(\theta, \mathbf{x}, y) \geq \tau_L(\alpha)$ , therefore<sup>2</sup>,

$$\begin{aligned} \Pr_{(\mathbf{x}, y) \sim \mathcal{D}} [\mathcal{B}] &\leq \Pr_{(\mathbf{x}, y) \sim \mathcal{D}} [\kappa(\theta, \mathbf{x}, y) \geq \tau_L(\alpha)] \\ &\leq \frac{\mathbb{E}[\kappa(\theta, \mathbf{x}, y)]}{\tau_L(\alpha)} && \text{(Markov's inequality)} \\ &\leq \frac{\varepsilon}{\tau_L(\alpha)}. \end{aligned}$$

The proof is complete.  $\square$

## B. Proof of Proposition 2

*Proof.* Let  $\mathcal{B}$  be the event  $\{(\exists y' \neq y, \mathbf{x}' \in \mathbf{x} + \mathcal{S}) C_{F_\theta}(\mathbf{x}') = y'\}$ . If  $\mathcal{B}$  happens then  $F_\theta(\mathbf{x}')_y \leq \frac{1}{2}$  (otherwise  $\mathbf{x}'$  will be classified as  $y$ ), and so  $\kappa(\theta, \mathbf{x}, y) \geq \tau_L(1/2)$ . On the other hand, if  $\mathcal{B}$  does not happen, then we can lower bound  $\kappa(\theta, \mathbf{x}, y)$  by 0. Therefore  $\varepsilon \geq \mathbb{E}[\kappa(\theta, \mathbf{x}, y)] \geq \Pr[\neg \mathcal{B}] \cdot 0 + \Pr[\mathcal{B}] \cdot \tau_L(1/2) = \Pr[\mathcal{B}] \cdot \tau_L(1/2)$ . Tightness follows as we can force equality for each of the inequalities. The proof is complete.  $\square$

## C. Proof of Proposition 3

*Proof.* By contraposition it suffices to prove the following

$$\begin{aligned} \Pr_{(\mathbf{x}, y) \sim \mathcal{D}} [(\forall y' \neq y, \mathbf{x}' \in N(\mathbf{x}, \eta)), \Gamma_\xi^{\text{MCN}}(\mathbf{x}')_{y'} < 1 - p] \\ \geq 1 - q. \end{aligned}$$

By assumption that  $F$  satisfies  $(p, q, \delta)$ -separation, with probability at least  $1 - q$  that  $(\mathbf{x}, y) \sim \mathcal{D}$ ,  $(\mathbf{x}, y)$  is  $(p, \delta)$ -good. For every such  $(p, \delta)$ -good point  $(\mathbf{x}, y)$ , by assumption, every  $\mathbf{z} \in N(\mathbf{x}, \eta)$  is  $(p, \text{MCN}_\xi)$ -good. Therefore for every such  $\mathbf{z}$ ,  $\Gamma_\xi^{\text{MCN}}(\mathbf{z})_y \geq p$ , and so  $(\forall y' \neq y), \Gamma_\xi^{\text{MCN}}(\mathbf{z})_{y'} < 1 - p$ . The proof is complete.  $\square$

## D. Bounding the probability for $(p, q, \delta)$ -separation

This section gives details of our estimation of  $(p, q, \delta)$ -separation from statistics in Table 1. Note that event  $\mathcal{E}_b$  corresponds to a Bernoulli trial. Let  $X_1, \dots, X_t$  be independent indicator random variables, where

$$X_i = \begin{cases} 1 & \text{if } \mathcal{E}_b \text{ happens,} \\ 0 & \text{otherwise} \end{cases},$$

and  $X = (\sum_{i=1}^t X_i)/t$ . Recall Chebyshev's inequality:

**Theorem 1** (Chebyshev's Inequality). *For independent random variables  $X_1, \dots, X_t$  bounded in  $[0, 1]$ , and  $X = (\sum_{i=1}^t X_i)/t$ , we have  $\Pr[|X - \mathbb{E}[X]| \geq \varepsilon] \leq \frac{\text{Var}[X]}{\varepsilon^2}$ .*

In our case,  $\mathbb{E}[X] = \mathbb{E}[X_1] = \dots = \mathbb{E}[X_t]$  and let it be  $\mu$ , and let the computed frequency be  $\hat{\mu}$  (observed value). Thus  $\Pr[|\hat{\mu} - \mu| \geq \varepsilon] \leq 1/(4\varepsilon^2 t)$  since  $\text{Var}[X] = \mu(1 - \mu)/t < 1/4t$ . We thus have the following proposition about  $(p, q, \delta)$ -separation.

**Proposition 5.** *Let  $\alpha, \varepsilon \in [0, 1]$ . For sufficiently large  $t$  where  $\frac{1}{4\varepsilon^2 t} \leq 1 - \alpha$  holds, we have:*

- (Upper bound) *With probability at least  $\alpha$ ,  $\mu$  is smaller than  $\hat{\mu} + \varepsilon$ .*
- (Lower bound) *With probability at least  $\alpha$ ,  $\mu$  is bigger than  $\hat{\mu} - \varepsilon$ .*

For example, we have guarantees for  $\alpha = .9$  by putting  $\varepsilon = .1$  and  $t \geq 250$ .

<sup>2</sup> Let  $X$  be a nonnegative random variable and  $a > 0$ , Markov's inequality says that  $\Pr[X \geq a] \leq \mathbb{E}[X]/a$ .
